# Supplementary material for: Intron Retention and TE Exonization Events inZRANB2
Source: Hindawi journal article supplement (doi:10.1155/2012/170208), 2012-01-01

FIGURE S1

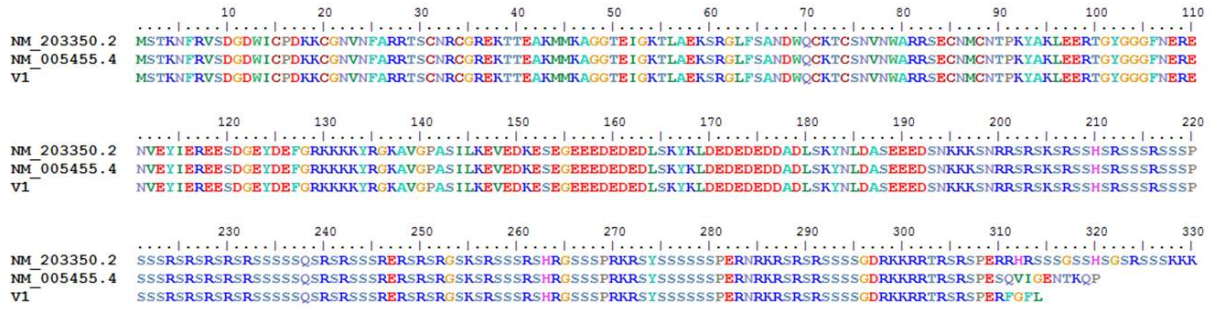

FIGURE S2

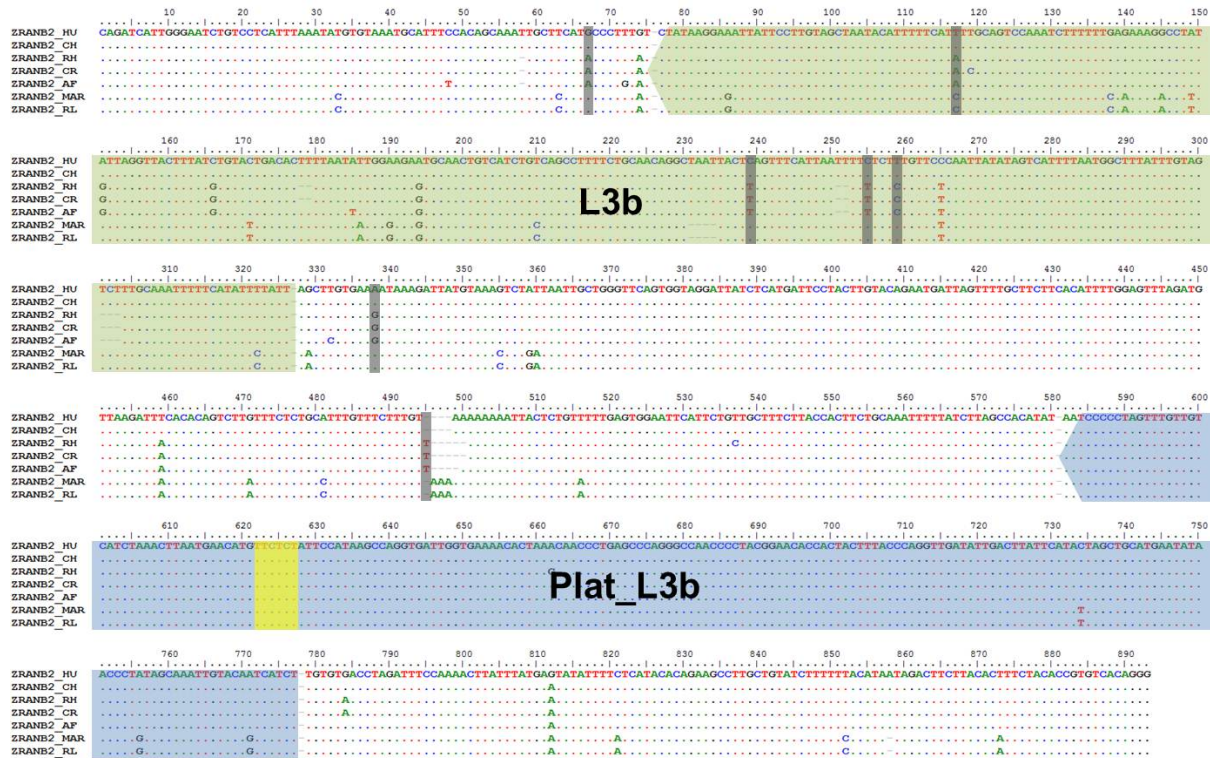

Supplement: f1 [file 170208.f1.pdf]
